# Supplementary material for: Silk fibroin-mediated biomineralization of calcium carbonate at the air/water interface
Source: Royal Society of Chemistry journal article supplement (doi:10.1039/c4ce01092b), 2014-01-01
Supplement: c4ce01092b1.pdf [file c4ce01092b1.pdf]

## Supporting Information

### Silk Fibroin-Mediated Biomineralization of Calcium Carbonate at the Air/Water Interface

Wei Hao,<sup>a</sup> David Porter,<sup>b</sup> Xianting Wang<sup>a</sup> and Zhengzhong Shao<sup>\*a</sup>

<sup>a</sup> State Key Laboratory of Molecular Engineering of Polymers, Advanced Materials Laboratory, Department of Macromolecular Science, Fudan University, Shanghai, 200433, People's Republic of China. E-mail: zzshao@fudan.edu.cn

<sup>b</sup> Department of Zoology, University of Oxford, South Parks Road, Oxford OX1 3PS, UK.

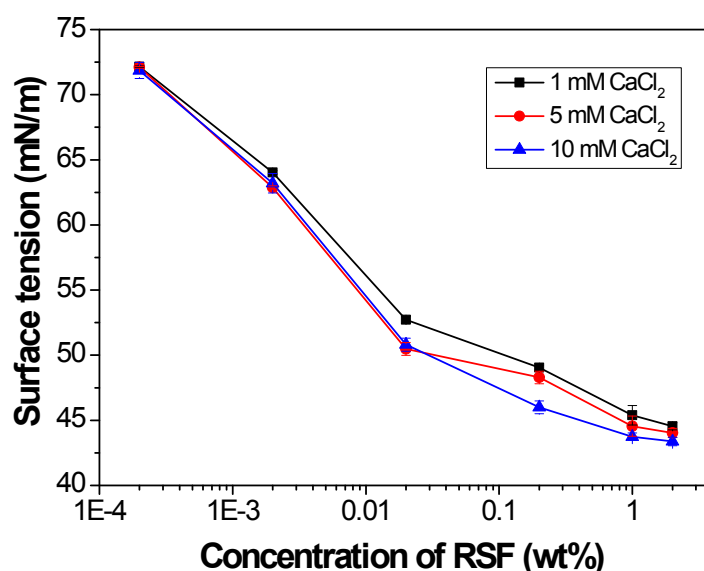

**Figure S1** Surface tension of the RSF-83 in the mineralization solution measured by Wilhelmy Plate method (Dataphysics DCAT 21). The platinum plate is pre-cleaned by flame treatment. The RSF solution is placed in a clean glass vessel. The presented data are average of 3 measurements.

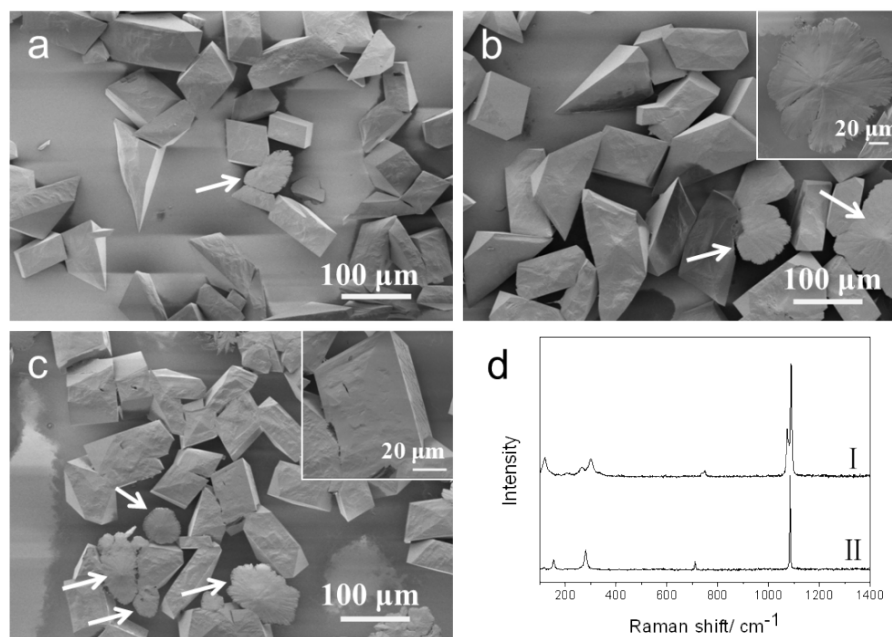

**Figure S2** FE-SEM images of CaCO<sub>3</sub> particles obtained at the air/water interface without any additive (control experiment). (a) [Ca<sup>2+</sup>] = 1 mmol/ L. (b) [Ca<sup>2+</sup>] = 5 mmol/ L. (c) [Ca<sup>2+</sup>] = 10 mmol/ L. Mineralization time: 72 h. The white arrows indicate vaterite particles. Insets in (b) and (c) show the vaterite particle and calcite particle, respectively. (d) Raman spectra of (I) vaterite and (II) calcite particles.

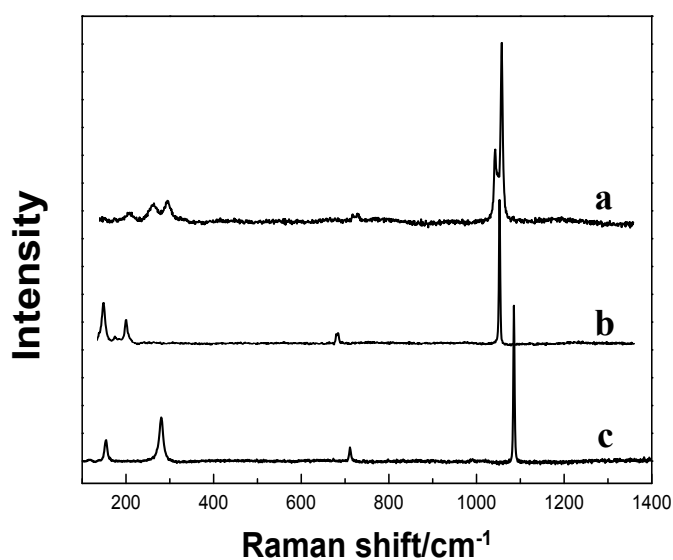

**Figure S3** Raman spectra of (a) vaterite, (b) aragonite and (c) calcite collected at the air/water interface with different concentration of RSF-83 and Ca<sup>2+</sup>.

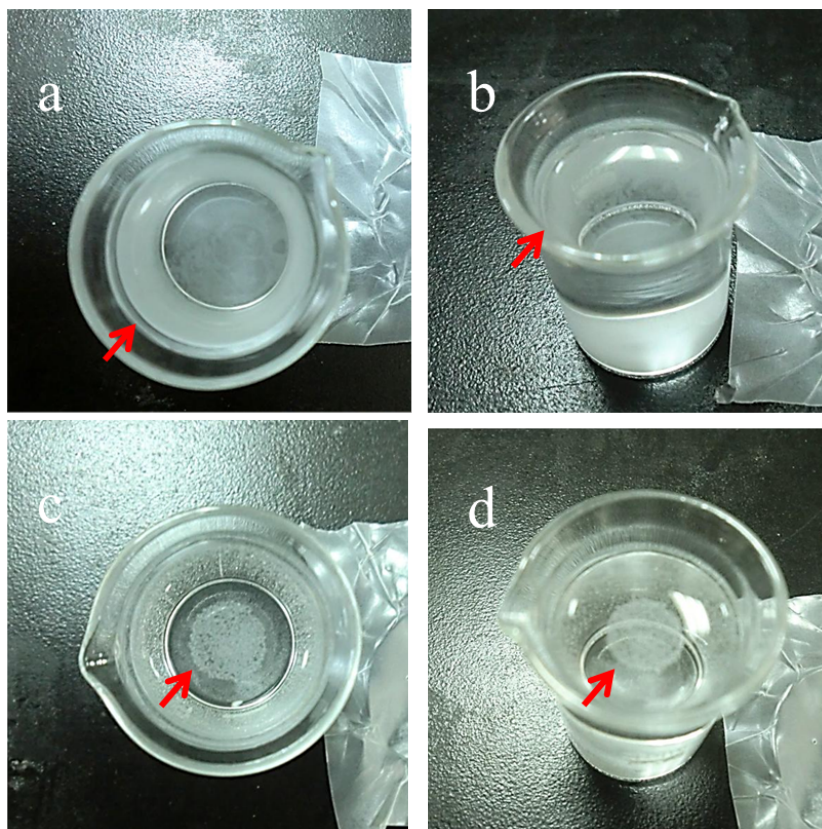

**Figure S4** Film-like  $\text{CaCO}_3$  layers (red arrow) formed at the air/solution interface with (a) and (b)  $[\text{RSF-83}] = 0.02 \text{ wt\%}$ , (c) and (d)  $[\text{RSF}] = 0 \text{ wt\%}$ .  $[\text{Ca}^{2+}] = 10 \text{ mmol/L}$ . Mineralization time: 72 h.

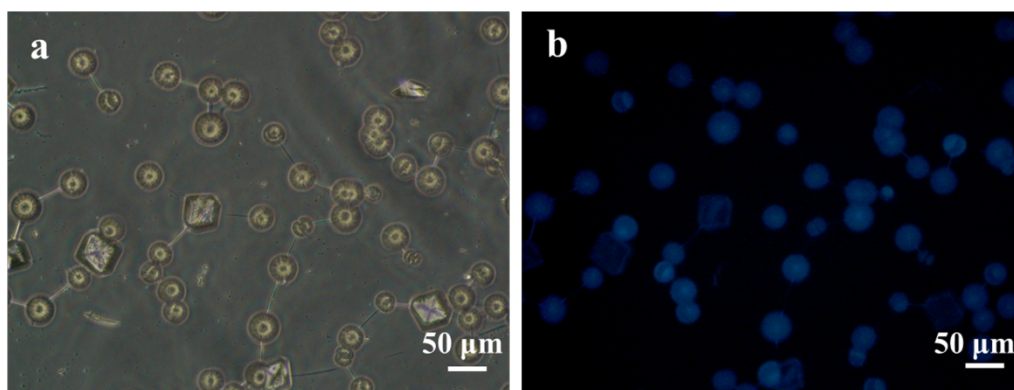

**Figure S5** Confocal fluorescence microscope images of calcite particles obtained at the air/water interface without washing by DIW.  $[\text{RSF-83}] = 0.1 \text{ wt\%}$ ,  $[\text{Ca}^{2+}] = 5 \text{ mM}$ . (a) is bright field images, (b) is dark field images. Mineralization time: 72 h. The excitation wavelength: 405 nm. Blue: RSF.

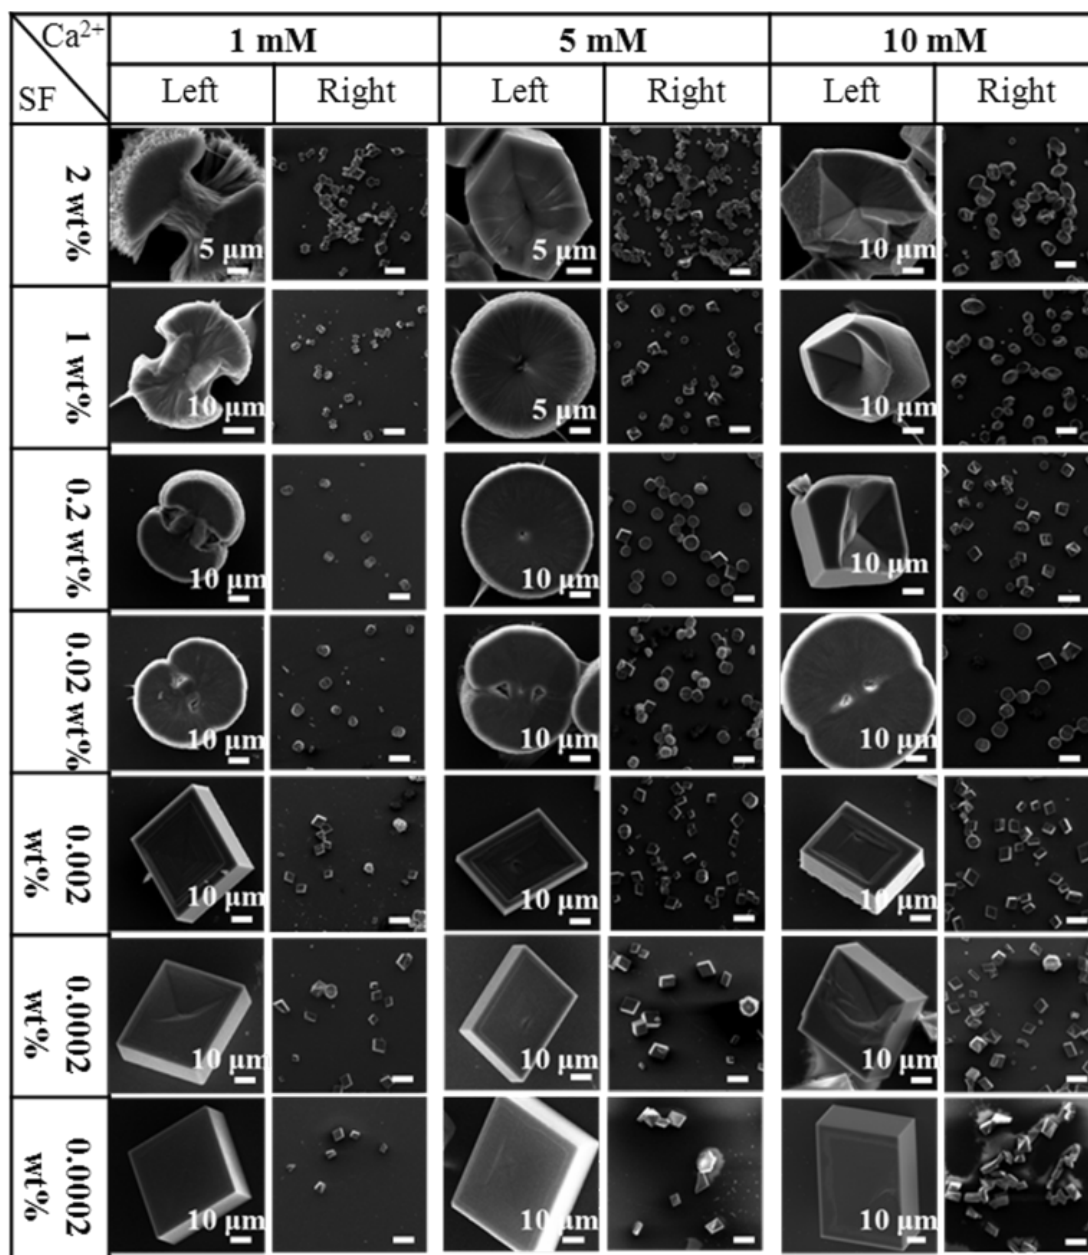

**Figure S6** SEM images of calcium carbonate crystals collected at the air/water interface with different concentration of RSF-185 and Ca<sup>2+</sup> (as noted in the figure). The microscope images are upper surface views. Left images are the enlarge images of the dominant crystal in the right images. Mineralization time: 72 h. Bars in right are 100 μm.

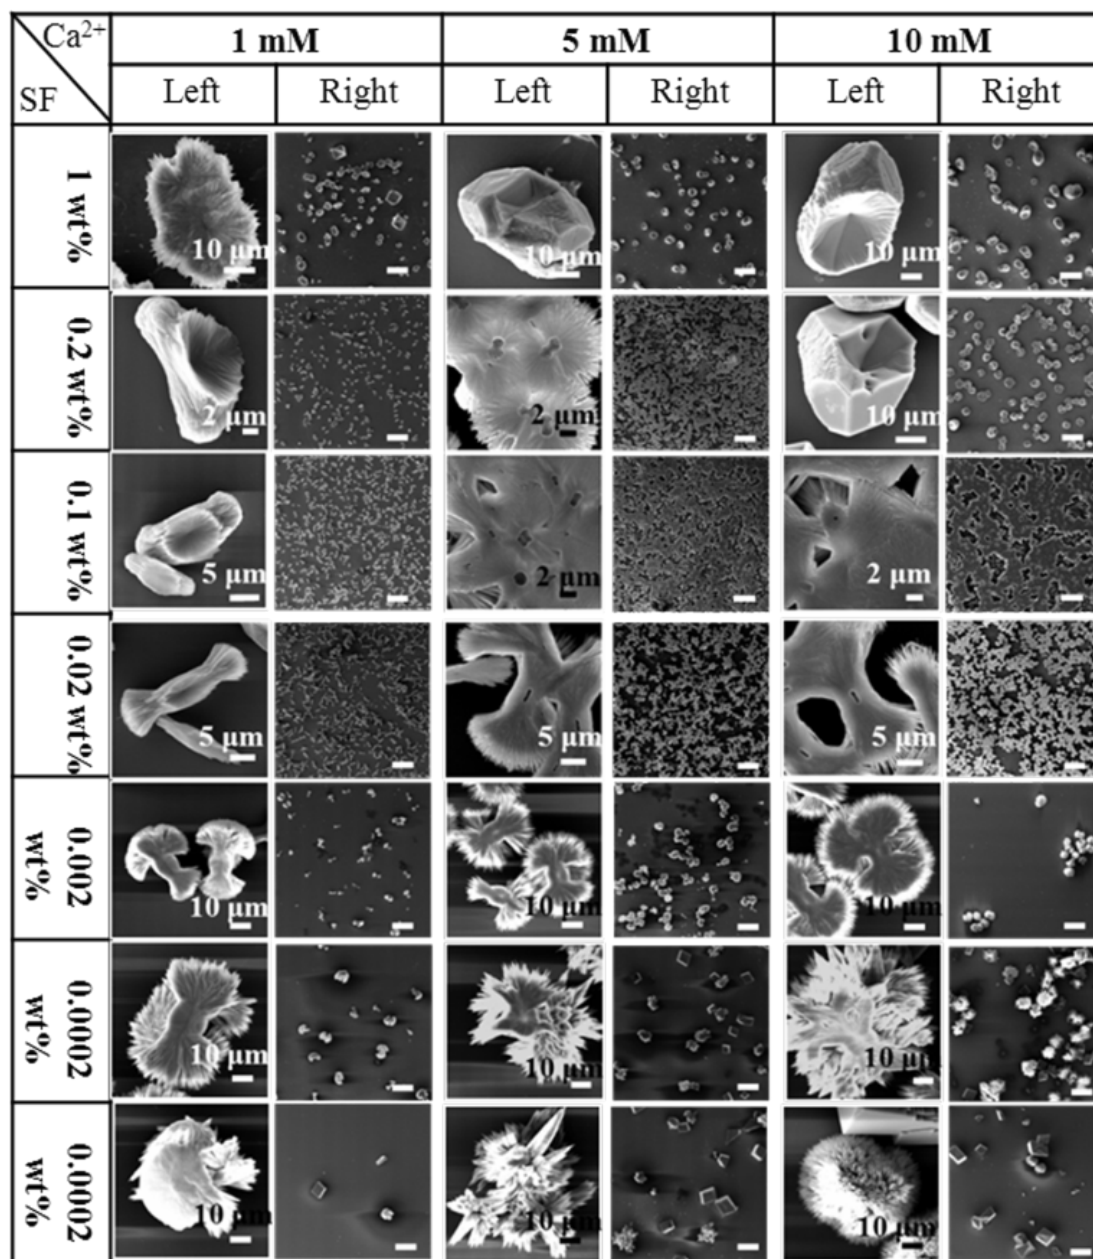

**Figure S7** SEM images of calcium carbonate crystals collected at the air/water interface with different concentration of RSF-36 and Ca<sup>2+</sup> (as noted in the figure). The microscope images are upper surface views. Left images are the enlarge images of the dominant crystal in the right images. Mineralization time: 72 h. Bars in right are 100  $\mu\text{m}$ .
